# Supplementary material
Source: PubMed Central journal article supplement (PMC4843658)
Supplement: rspb20160214supp1.pdf [file rspb20160214supp1.pdf]

1 **Supplementary material**

2

3 **Supplementary material includes following files:**

4 1. Supplementary figures S1-S7

5 2. Most parsimonious trees resultant from phylogenetic analysis

6 3. Description of morphological characters used in phylogenetic and evolutionary rate  
7 analyses

8 4. Data matrix of morphological characters used in phylogenetic and evolutionary rate  
9 analyses

10 5. Stratigraphic age of taxa used in evolutionary rate analysis given in a separate  
11 Excel file in “dataset S1.xls”

12 6. Supplementary references

13

14 All scripts and data files are available on DRYAD (doi:10.5061/dryad.c128h)

15

16

17

18

19

20

21

22

23

24

25

26

27

28

29

30

31 **1. Supplementary figures**

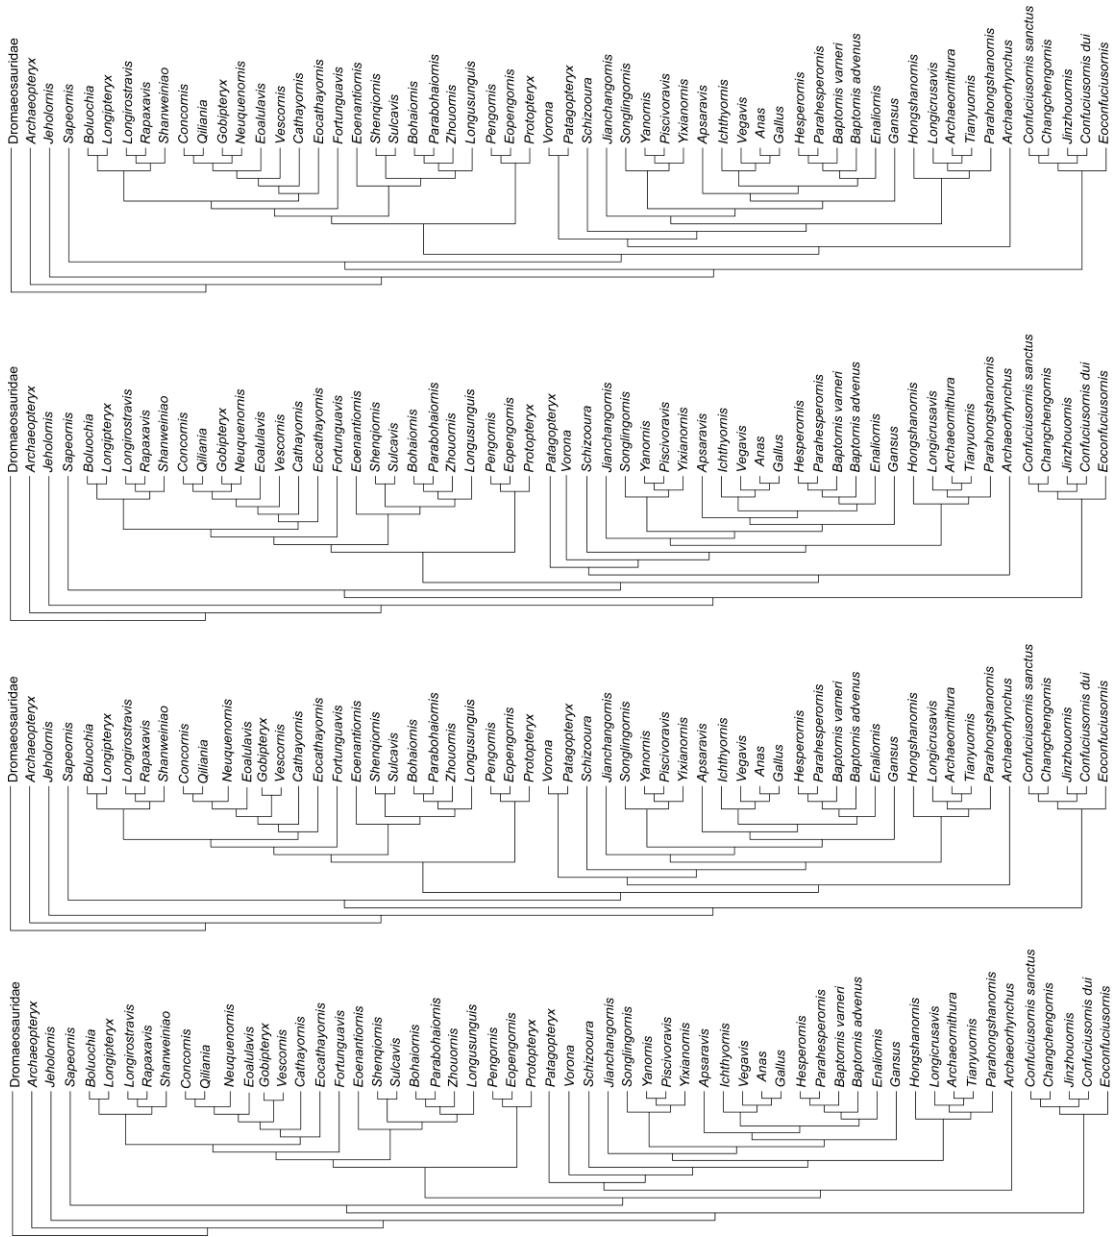

32

33 **Figure S1.** The four most parsimonious trees resultant from phylogenetic analysis

34 using the data matrix in Wang *et al.* [1].

35

36

37

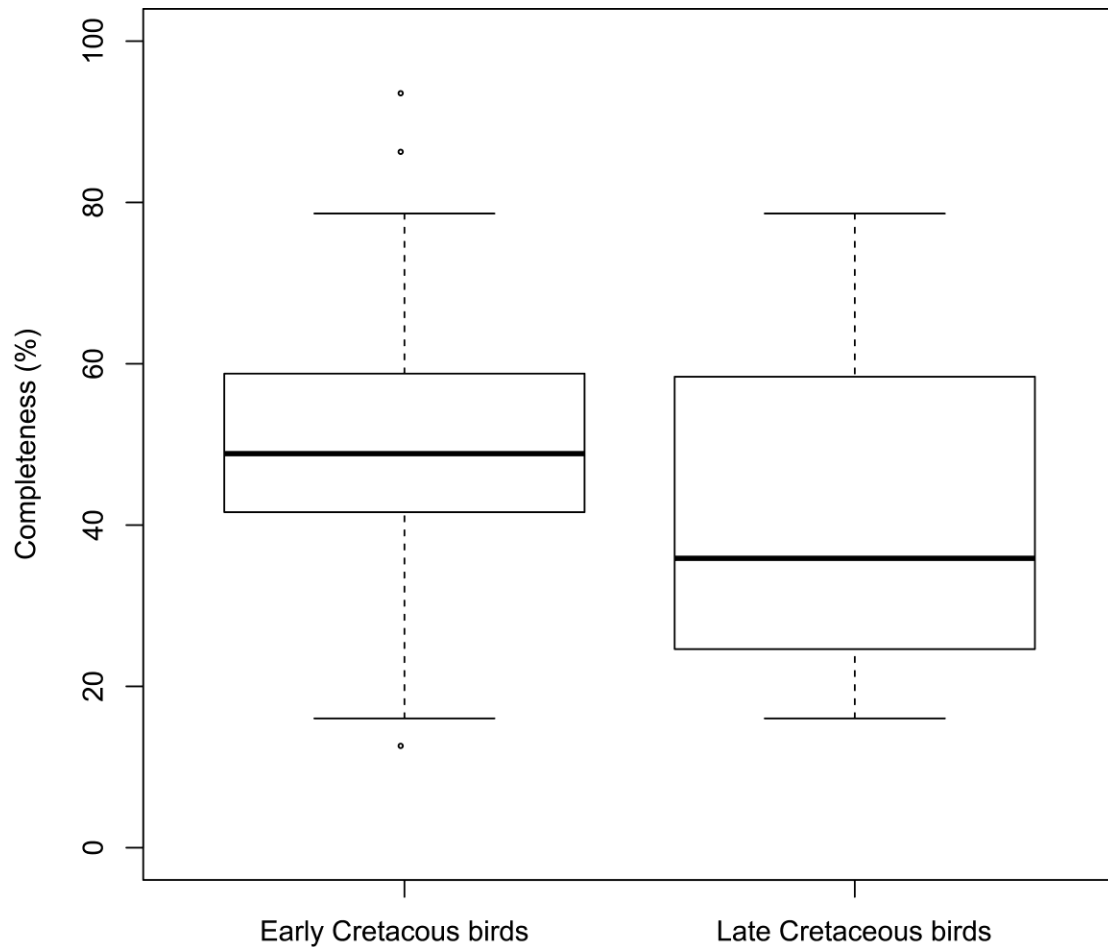

38

39 **Figure S2.** Box-and-whisker plot comparing the completeness of characters scores of

40 Early and Late Cretaceous birds in the phylogenetic analysis, using the data matrix in

41 Wang *et al.* [1]. The box-and-whisker plot splits the data into quarters, but removes

42 outliers (plotted as circles). The main box contains 50% of the data and the whiskers

43 at the top and bottom represent the other 25%.

44

45

46

47

48

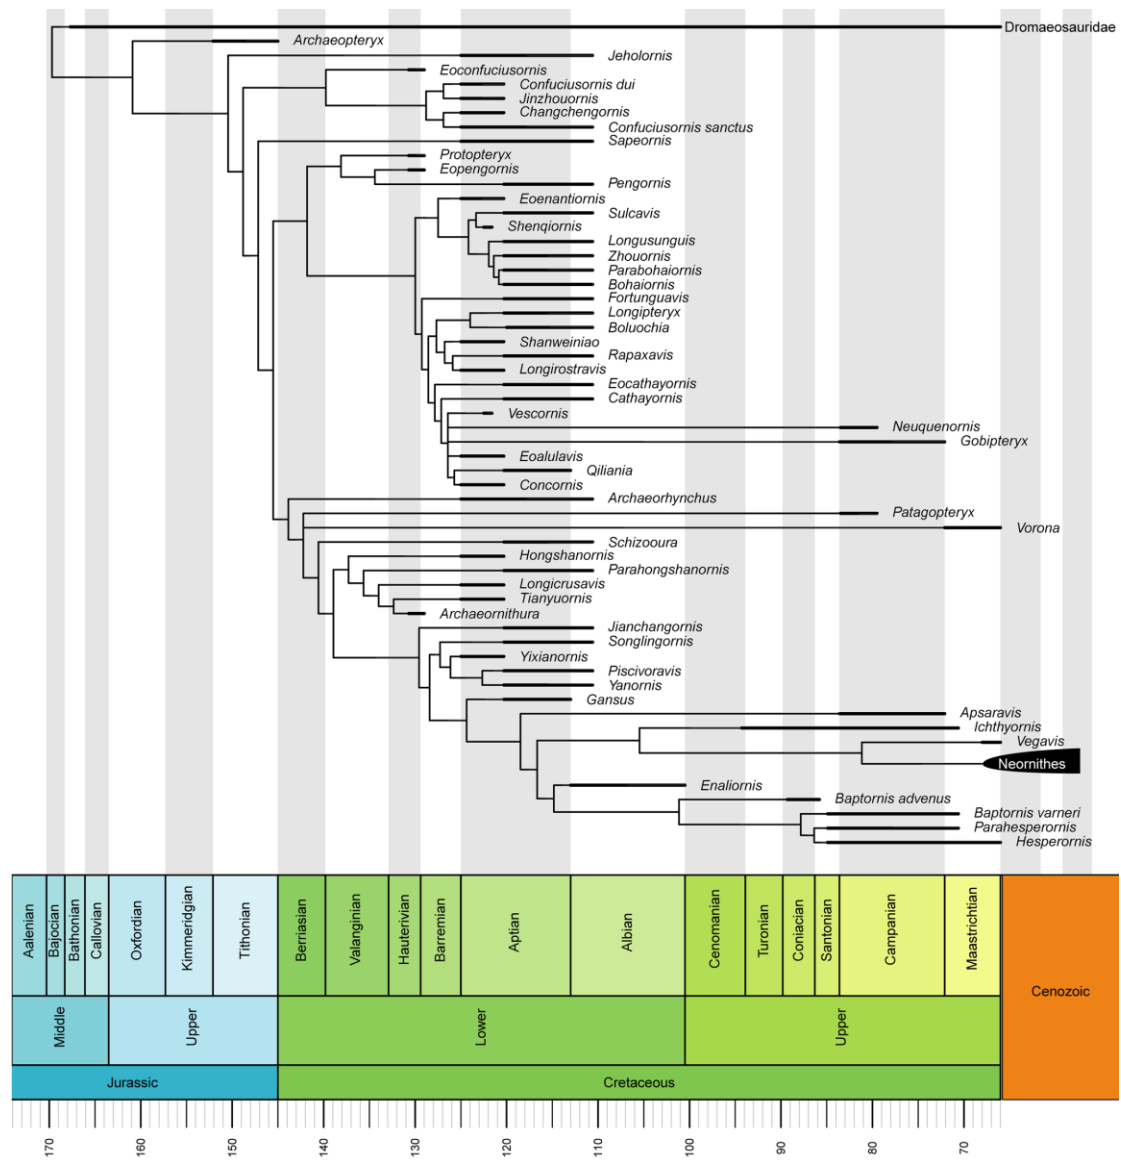

49 **Figure S3.** Time-scaled phylogeny of Mesozoic birds, and the Zero-length branches  
 50 are rescaled using the “equal” method and a root-length of 2 Ma [2].

51  
 52  
 53  
 54  
 55  
 56

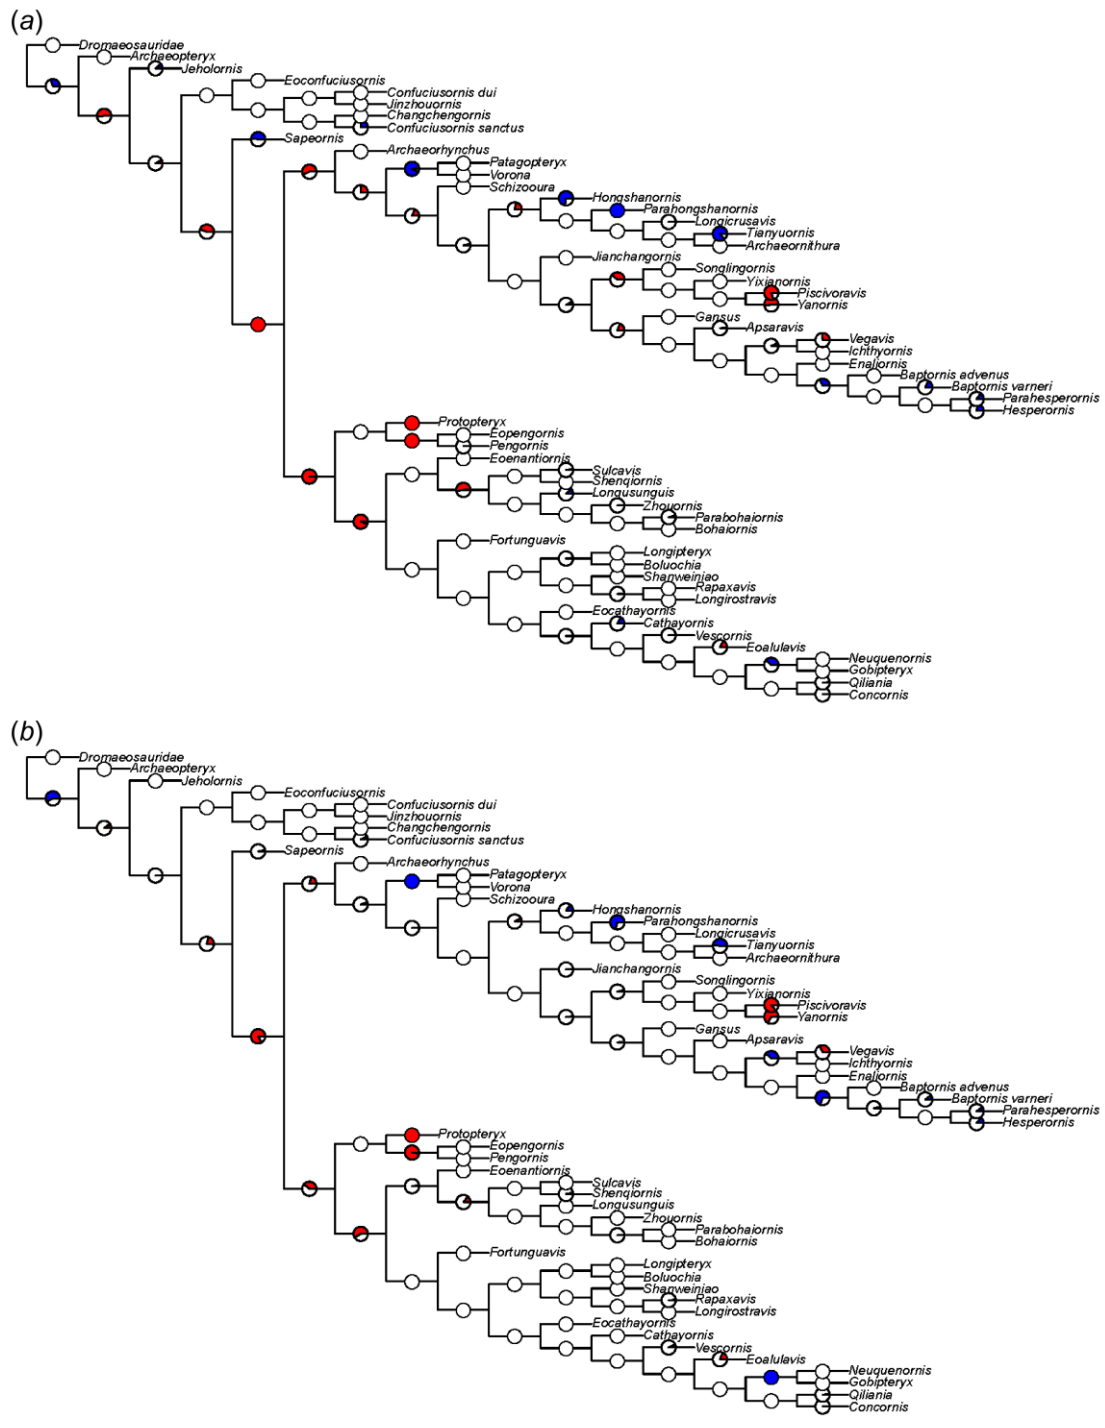

57 **Figure S4.** Evolutionary rate analysis of Mesozoic birds using the “mb1” scaling  
 58 method and a minimum branch length of 1 Ma. (a) Result of branch likelihood test for  
 59 the first most parsimonious tree where branches are not treated separately; (b) result  
 60 of branch likelihood test for the same tree where terminal and internal branches are  
 61 treated separately. For complete results of tests using the “mb1” and “equal” methods

62 please see our DRYAD data. Pie charts indicate the proportional distribution of results  
63 in 50 replicates of randomized dated trees, where red indicates branches or clades  
64 with significantly high rates, blue significantly low rates, and white non-significant  
65 (“average”) rates. In all cases the null hypothesis of a single rate of evolution across  
66 the entire tree was rejected at an alpha of 0.01.

67

68

69

70

71

72

73

74

75

76

77

78

79

80

81

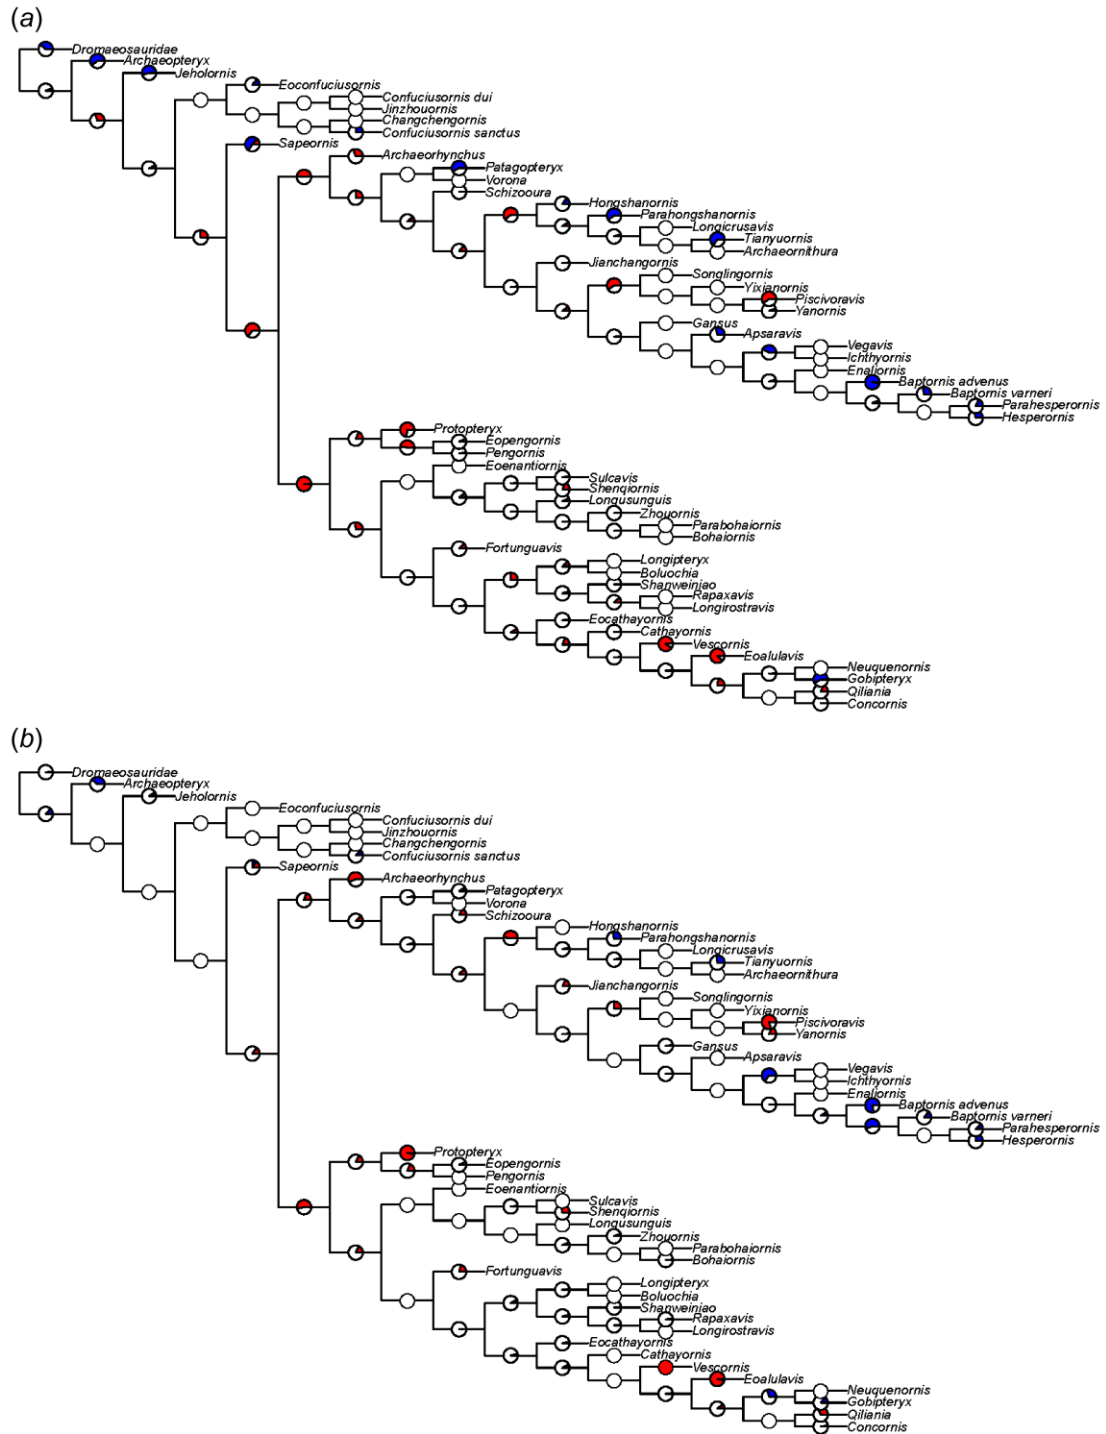

82 **Figure S5.** Evolutionary rate analysis of Mesozoic birds using the “equal” scaling  
 83 method and a root length of 2 Ma. (a) Result of branch likelihood test for the first  
 84 most parsimonious tree where branches are not treated separately; (b) result of branch  
 85 likelihood test for the same tree where terminal and internal branches are treated

86 separately. For all plots the color scheme repeats that of figure S4.

87

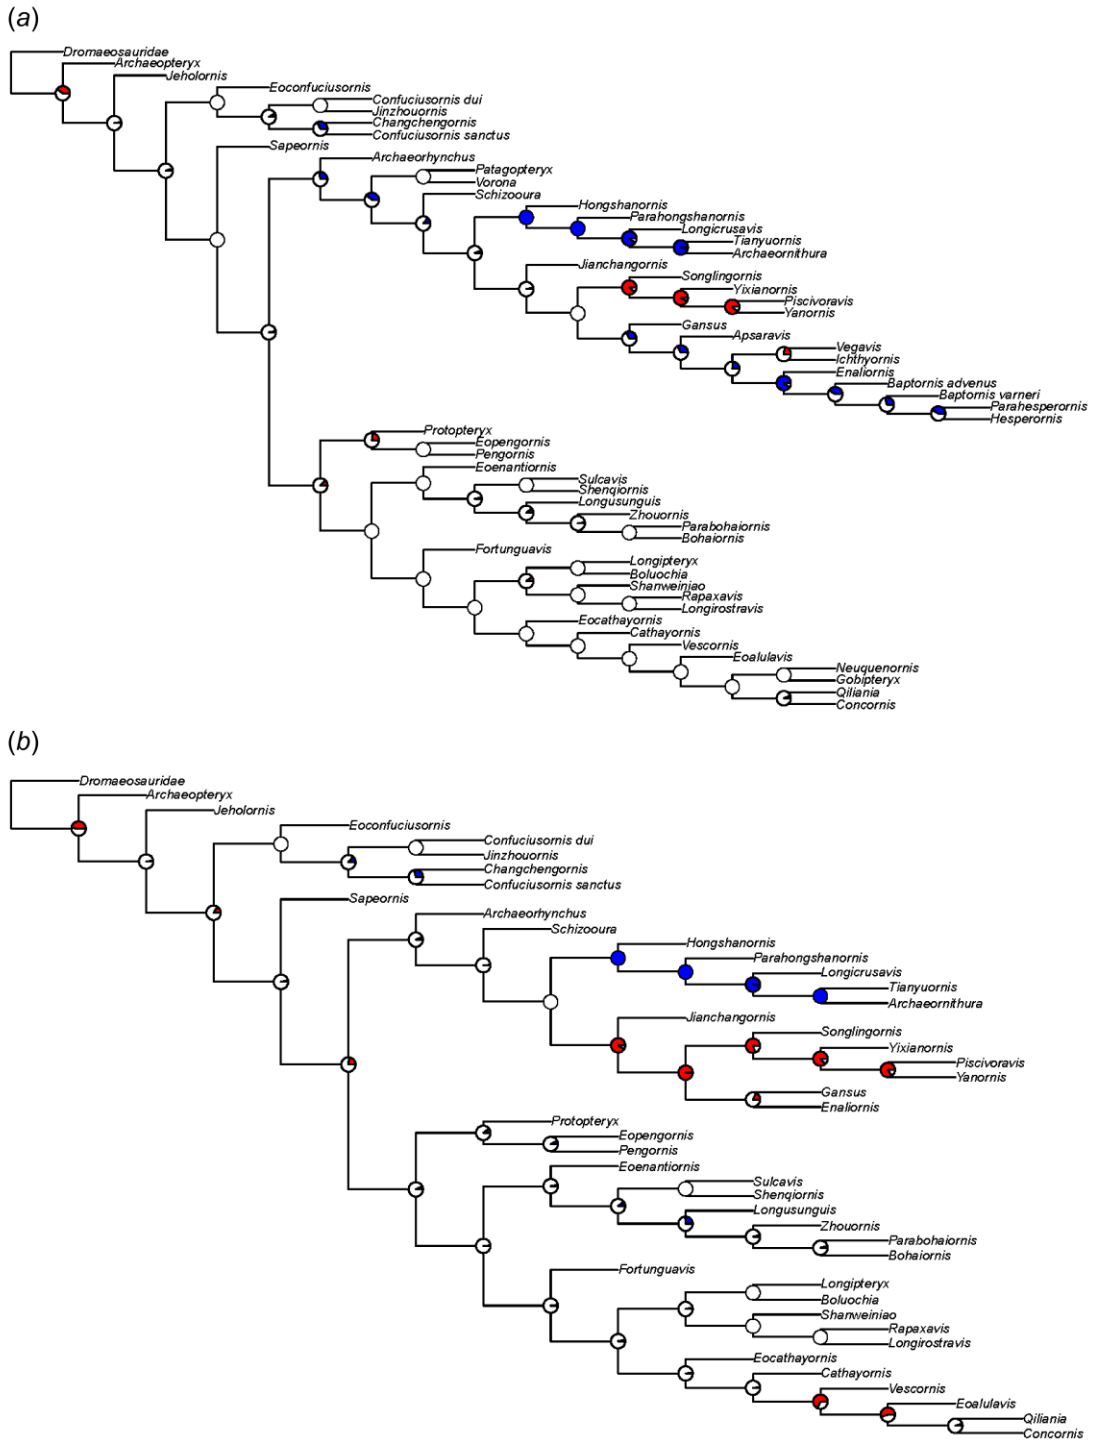

88

89 **Figure S6.** Results of clade likelihood test for the first most parsimonious tree using



90 the “mb1” scaling method and a minimum branch-length of 1 Ma [3]. (a) All  
 91 Mesozoic birds are included; (b) the Late Cretaceous taxa are excluded. For all plots  
 92 the color scheme repeats that of figure S4.  
 93

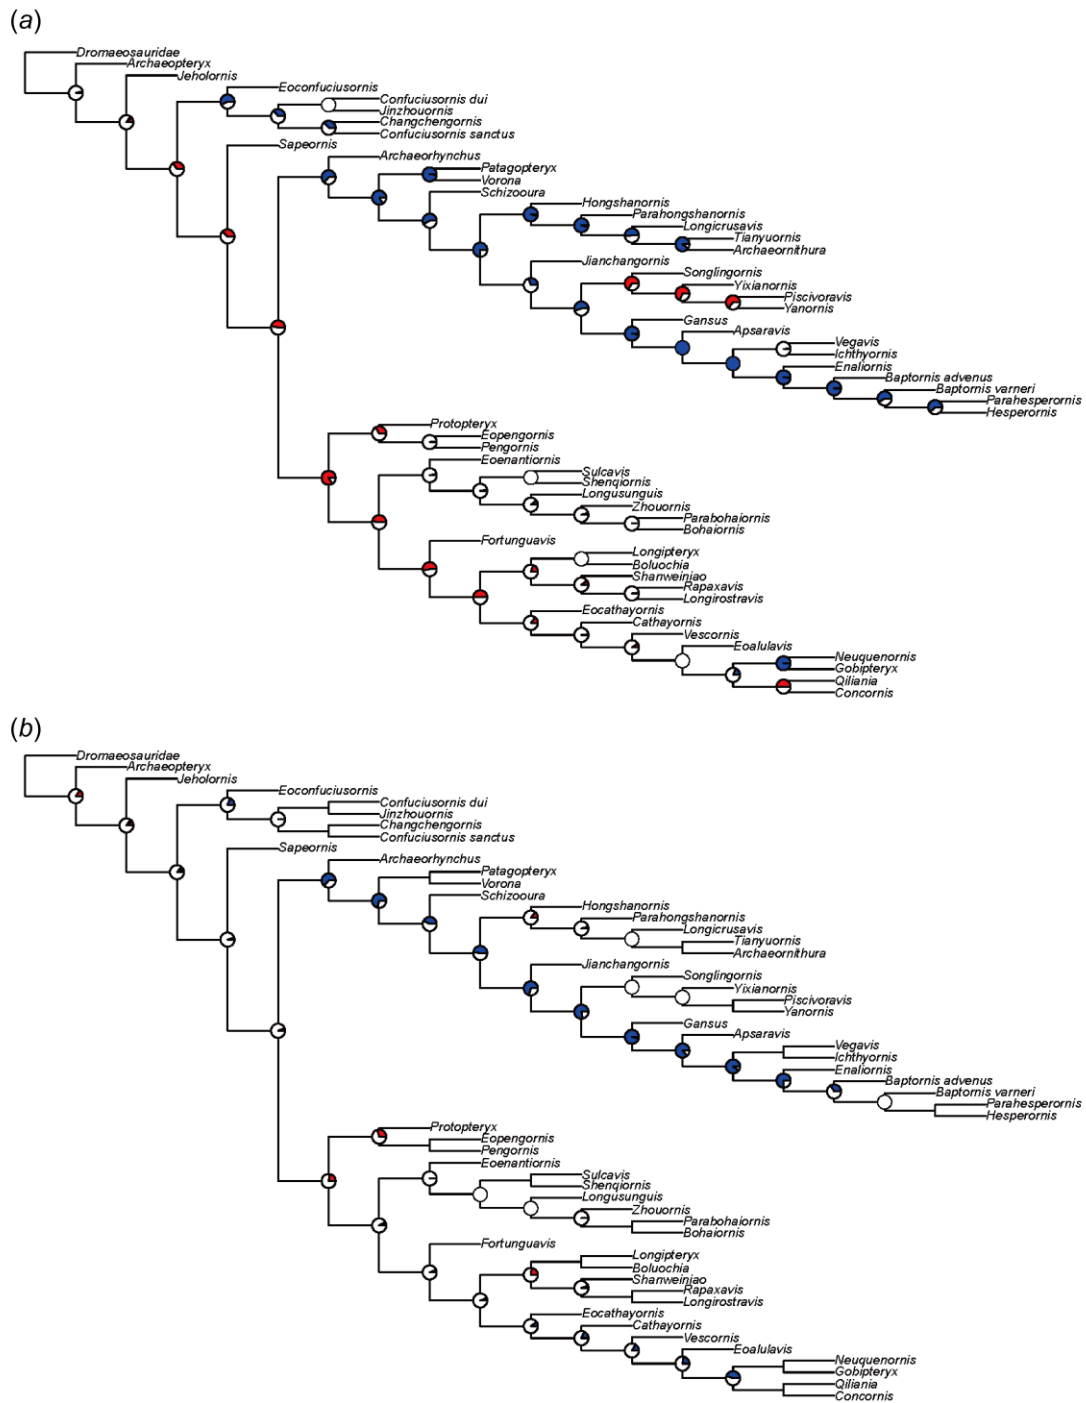

94 **Figure S7.** Results of clade likelihood test for the first most parsimonious tree using

95 the “equal” method and a root-length of 2 Ma [2]. (a) All Mesozoic birds are included;  
96 (b) the Late Cretaceous taxa are excluded. For all plots the color scheme repeats that  
97 of figure S4.

98

## 99 **2. Most parsimonious trees resultant from phylogenetic analysis**

100 treePAUP\_1=[&R]

101 (1:0,(2:7,(3:12,((4:13,((((((10:4,17:0):9,((18:3,23:6):4,24:1):10):9,((((((11:3,46:3):8,(  
102 16:1,19:2):3):7,12:7):5,25:11):9,13:5):6,14:2):12):7,45:16):8,(15:5,((47:6,48:1):6,(((4  
103 9:4,50:3):4,52:5):2,51:3):4):6):12):15,((20:5,21:5):12,22:13):13):30,(((26:5,33:3):26,(  
104 27:12,((28:14,((30:3,((32:8,53:13):7,34:8):1):11,((31:23,((36:25,(42:3,(43:11,44:16):3  
105 ):26):18,(((37:1,38:0):3,41:0):5,40:1):2,39:1):24):11):17,35:17):17):7):8,(54:3,((55:3,  
106 (56:0,58:0):3):1,57:2):1):19):11):15):18,29:15):30):23,(((5:0,6:2):9,(8:1,9:1):7):9,  
107 7:4):19):13):39):30):0;

108 treePAUP\_2=[&R]

109 (1:0,(2:7,(3:12,((4:12,((((((10:4,17:0):9,((18:3,23:6):4,24:1):10):9,((((((11:3,46:3):8,(  
110 16:1,19:2):3):7,12:7):5,25:11):9,13:5):6,14:2):12):7,45:16):8,(15:5,((47:6,48:1):6,(((4  
111 9:4,50:3):4,52:5):2,51:3):4):6):12):15,((20:5,21:5):12,22:13):13):32,(((26:7,(27:12,((2  
112 8:14,((30:3,((32:8,53:13):7,34:8):1):11,((31:23,((36:25,(42:3,(43:11,44:16):3):26):18,(  
113 (((37:1,38:0):3,41:0):5,40:1):2,39:1):24):11):17,35:17):17):7):8,(54:3,((55:3,(56:0,58:  
114 0):3):1,57:2):1):19):11):5):14,33:23):18,29:13):30):24):23,(((5:0,6:2):9,(8:1,9:1):7):9,  
115 7:4):20):12):39):30):0;

116 treePAUP\_3=[&R]  
117 (1:0,(2:7,(3:12,((4:13,(((((((10:4,17:0):9,((18:3,23:6):4,24:1):10):9,(((((((11:3,46:3):4,1  
118 9:5):8,12:7):6,(16:3,25:1):10):9,13:5):6,14:2):12):7,45:16):8,(15:5,((47:6,48:1):6,(((49  
119 :4,50:3):4,52:5):2,51:3):4):6):12):15,((20:5,21:5):12,22:13):13):30,(((26:5,33:3):26,(2  
120 7:12,((28:14,((30:3,((32:8,53:13):7,34:8):1):11,((31:23,((36:25,(42:3,(43:11,44:16):3):  
121 26):18,((((37:1,38:0):3,41:0):5,40:1):2,39:1):24):11):17,35:17):17):7):8,(54:3,((55:3,(  
122 56:0,58:0):3):1,57:2):1):19):11):15):18,29:15):30):23):23,(((5:0,6:2):9,(8:1,9:1):7):9,7  
123 :4):19):13):39):30):0;

124 treePAUP\_4=[&R]  
125 (1:0,(2:7,(3:12,((4:12,(((((((10:4,17:0):9,((18:3,23:6):4,24:1):10):9,(((((((11:3,46:3):4,1  
126 9:5):8,12:7):6,(16:3,25:1):10):9,13:5):6,14:2):12):7,45:16):8,(15:5,((47:6,48:1):6,(((49  
127 :4,50:3):4,52:5):2,51:3):4):6):12):15,((20:5,21:5):12,22:13):13):32,(((26:7,(27:12,((28  
128 :14,((30:3,((32:8,53:13):7,34:8):1):11,((31:23,((36:25,(42:3,(43:11,44:16):3):26):18,((  
129 ((37:1,38:0):3,41:0):5,40:1):2,39:1):24):11):17,35:17):17):7):8,(54:3,((55:3,(56:0,58:0  
130 ):3):1,57:2):1):19):11):5):14,33:23):18,29:13):30):24):23,(((5:0,6:2):9,(8:1,9:1):7):9,7:  
131 4):20):12):39):30):0;

132 End;

133

134

135

136

137

138

139

140

141

142

143

144 **3. Description of morphological character used in the rate analysis from Wang *et***

145 ***al.* [1]**

146

147 1. Premaxillae in adults: unfused (0); fused only rostrally (1); completely fused (2).

148 (ORDERED)

149 2. Maxillary process of the premaxilla: restricted to its rostral portion (0); subequal or  
150 longer than the facial contribution of the maxilla (1).

151 3. Frontal process of the premaxilla: short (0); relatively long, approaching the rostral  
152 border of the antorbital fenestra (1); very long, extending caudally near the level  
153 of lacrimals (2). (ORDERED)

154 4. Premaxillary teeth: present throughout (0); present but rostral tip edentulous (1);  
155 present but restricted to rostral portion (2); absent (3).

156 5. Caudal margin of naris: far rostral than the rostral border of the antorbital fossa (0);  
157 nearly reaching or overlapping the rostral border of the antorbital fossa (1).

158 6. Naris longitudinal axis: considerably shorter than the long axis of the antorbital  
159 fossa (0); subequal or longer (1).

160 7. Maxillary teeth: present (0); absent (1).

161 8. Dorsal (ascending) ramus of the maxilla: present with two fenestra (the  
162 promaxillary and maxillary fenestra) (0); present with one fenestra (1);  
163 unfenestrated (2); ramus absent (3). (ORDERED)

164 9. Caudal margin of choana: located rostrally, not overlapping the region of the orbit  
165 (0); displaced caudally, at the same level or overlapping the rostral margin of the  
166 orbit (1).

- 167 10. Rostral margin of the jugal: away from the caudal margin of the naris (0); or very  
168 close to (leveled with) the caudal margin of the naris (1).
- 169 11. Contact between palatine and maxilla/premaxilla: palatine contact maxilla only  
170 (0); contacts premaxilla and maxilla (1).
- 171 12. Vomer and pterygoid articulation: present, well developed (0); reduced, narrow  
172 process of pterygoid passes dorsally over palatine to contact vomer (1); absent,  
173 pterygoid and vomer do not contact (2).
- 174 13. Jugal process of palatine: present (0); absent (1).
- 175 14. Contact between palatine and pterygoid: long, craniocaudally overlapping contact  
176 (0); short, primarily dorsoventral contact (1).
- 177 15. Contact between vomer and premaxilla: present (0); absent (1).
- 178 16. Ectopterygoid: present (0); absent (1).
- 179 17. Postorbital: present (0); absent (1)..
- 180 18. Contact between postorbital and jugal: present (0); absent (1).
- 181 19. Quadratojugal: sutured to the quadrate (0); joined through a ligamentary  
182 articulation (1).
- 183 20. Lateral, round cotyla on the mandibular process of the quadrate (quadratojugal  
184 articulation): absent (0); present (1).
- 185 21. Contact between the quadratojugal and squamosal: present (0); absent (1).
- 186 22. Squamosal incorporated into the braincase, forming a zygomatic process: absent  
187 (0); present (1).
- 188 23. Squamosal, ventral or “zygomatic” process: variably elongate, dorsally enclosing  
189 otic process of the quadrate and extending cranioventrally along shaft of this bone,  
190 dorsal head of quadrate not visible in lateral view (0); short, head of quadrate  
191 exposed in lateral view (1).
- 192 24. Frontal/parietal suture in adults: open (0); fused (1).
- 193 25. Quadrate orbital process (pterygoid ramus): broad (0); sharp and pointed (1).
- 194 26. Quadrate pneumaticity: absent (0); present (1).

- 195 27. Quadrate: articulating only with the squamosal (0); articulating with both prootic  
196 and squamosal (1).
- 197 28. Otic articulation of the quadrate: articulates with a single facet (squamosal) (0);  
198 articulates with two distinct facets (prootic and squamosal) (1); articulates with  
199 two distinct facets and quadrate differentiated into two heads (2). (ORDERED)
- 200 29. Quadrate distal end: with two transversely aligned condyles (0); with a triangular,  
201 condylar pattern, usually composed of three distinct condyles (1).
- 202 30. Basipterygoid processes: long (0); short (articulation with pterygoid subequal to,  
203 or longer than, amount projected from the basisphenoid rostrum) (1).
- 204 31. Pterygoid, articular surface for basipterygoid process: concave “socket”, or short  
205 groove enclosed by dorsal and ventral flanges (0); flat to convex (1); flat to  
206 convex facet, stalked, variably projected (2). (ORDERED)
- 207 32. Eustachian tubes: paired, lateral, and well-separated from each other (0); paired,  
208 close to each other and to cranial midline or forming a single cranial opening (1).
- 209 33. Osseous interorbital septum (mesethmoid): absent (0); present (1).
- 210 34. Dentary teeth: present (0); absent (1).
- 211 35. Dentary tooth implantation: teeth in individual sockets (0); teeth in a communal  
212 groove (1).
- 213 36. Symphyseal portion of dentaries: unfused (0); fused (1).
- 214 37. Deeply notched rostral end of the mandibular symphysis: absent (0); present (1).
- 215 38. Mandibular symphysis, symphyseal foramina: absent (0); single (1); paired (2).
- 216 39. Mandibular symphysis, symphyseal foramen/foramina: opening on caudal edge of  
217 symphysis (0); opening on dorsal surface of symphysis (1).
- 218 40. Small ossification present at the rostral tip of the mandibular symphysis  
219 (intersymphyseal ossification): absent (0); present (1).
- 220 41. Caudal margin of dentary strongly forked: unforked, or with a weakly developed  
221 dorsal ramus (0); strongly forked with the dorsal and ventral rami approximately  
222 equal in caudal extent (1).

- 223 42. Mandibular ramus sigmoidal such that the rostral tip is dorsally convex and the  
224 caudal end is dorsally concave: absent (0); present (1).
- 225 43. Cranial extent of splenial: stops well caudal to mandibular symphysis (0);  
226 extending to mandibular symphysis, though noncontacting (1); extending to  
227 proximal tip of mandible, contacting on midline (2). (ORDERED)
- 228 44. Meckel's groove (medial side of mandible): not completely covered by splenial,  
229 deep and conspicuous medially (0); covered by splenial, not exposed medially (1).
- 230 45. Rostral mandibular fenestra: absent (0); present (1).
- 231 46. Caudal mandibular fenestra: present (0); absent (1).
- 232 47. Articular pneumaticity: absent (0); present (1).
- 233 48. Teeth: serrated crowns (0); unserrated crowns (1).
- 234 49. Atlantal hemiarches in adults: unfused (0); fused, forming a single arch (1).
- 235 50. One or more pneumatic foramina piercing the centra of mid-cranial cervicals,  
236 caudal to the level of the parapophysis-diapophysis: present (0); absent (1).
- 237 51. Cervical vertebrae: variably dorsoventrally compressed, amphicoelous  
238 ("biconcave": flat to concave articular surfaces) (0); cranial surface heterocoelous  
239 (i.e., mediolaterally concave, dorsoventrally convex), caudal surface flat or  
240 slightly concave (1); heterocoelous cranial (i.e., mediolaterally concave,  
241 dorsoventrally convex) and caudal (i.e., mediolaterally convex, dorsoventrally  
242 concave) surfaces (2). (ORDERED)
- 243 52. Prominent carotid processes in the intermediate cervicals: absent (0); present (1).
- 244 53. Postaxial cervical epiphyses: prominent, projecting further back from the  
245 postzygapophysis (0); weak, not projecting further back from the  
246 postzygapophysis, or absent (1).
- 247 54. Keel-like ventral surface of cervical centra: absent (0); present (1).
- 248 55. Prominent (50% or more the height of the centrum's cranial articular surface)  
249 ventral processes of the cervicothoracic vertebrae: absent (0); present (1).

- 250 56. Thoracic vertebral count: 13-14 (0); 11-12 (1); fewer than 11 (2). The transition  
251 between cervical and thoracic vertebrae is often difficult to identify, which makes  
252 counting these vertebrae problematic. (ORDERED)
- 253 57. Thoracic vertebrae: at least part of series with subround, central articular surfaces  
254 (e.g., amphicoelous/opisthocoelous) that lack the dorsoventral compression seen  
255 in heterocoelous vertebrae (0); series completely heterocoelous (1).
- 256 58. Caudal thoracic vertebrae, centra, length and midpoint width: approximately equal  
257 in length and midpoint width (0); length markedly greater than midpoint width  
258 (1).
- 259 59. Wide vertebral foramen in the mid-caudal thoracic vertebrae, vertebral  
260 foramen/articular cranial surface ratio (vertical diameter) larger than 0.40: absent  
261 (0); present (1).
- 262 60. Hyposphene-hypantrum accessory intervertebral articulations in the thoracic  
263 vertebrae: present (0); absent (1).
- 264 61. Lateral side of the thoracic centra: weakly or not excavated (0); deeply excavated  
265 by a groove (1); excavated by a broad fossa (2).
- 266 62. Cranial thoracic vertebrae, parapophyses: located in the cranial part of the centra  
267 of the thoracic vertebrae (0); located in the central part of the centra of the  
268 thoracic vertebrae (1).
- 269 63. Notarium: absent (0); present (1).
- 270 64. Sacral vertebrae, number ankylosed (synsacrum): less than 7 (0); 7 (1); 8 (2); 9 (3);  
271 10 (4); 11 or more (5); 15 or more (6). (ORDERED)
- 272 65. Synsacrum, procoelous articulation with last thoracic centrum (deeply concave  
273 facet of synsacrum receives convex articulation of last thoracic centrum): absent  
274 (0); present (1).
- 275 66. Cranial vertebral articulation of first sacral vertebra: approximately equal in  
276 height and width (0); wider than high (1).



- 277 67. Series of short sacral vertebrae with dorsally directed parapophyses just cranial to  
278 the acetabulum: absent (0); present, three such vertebrae (1); present, four such  
279 vertebrae (2). (ORDERED)
- 280 68. Convex caudal articular surface of the synsacrum: absent (0); present (1).
- 281 69. Degree of fusion of distal caudal vertebrae: fusion absent (0); few vertebrae  
282 partially ankylosed (intervening elements are well-discernable) (1); vertebrae  
283 completely fused into a pygostyle (2). (ORDERED)
- 284 70. Free caudal vertebral count: more than 35 (0); 35-26 (1); 25 - 20 (2); 19-9 (3); 8 or  
285 less (4). (ORDERED)
- 286 71. Procoelous caudals: absent (0); present (1).
- 287 72. Distal caudal vertebra prezygapophyses: elongate, exceeding the length of the  
288 centrum by more than 25% (0); shorter (1); absent (2). (ORDERED)
- 289 73. Free caudals, length of transverse processes: approximately equal to, or greater  
290 than, centrum width (0); significantly shorter than centrum width (1).
- 291 74. Proximal haemal arches: elongate, at least 3 times longer than wider (0); shorter  
292 (1); absent (2). (ORDERED)
- 293 75. Pygostyle: longer than or equal to the combined length of the free caudals (0);  
294 shorter (1).
- 295 76. Cranial end of pygostyle dorsally forked: absent (0); present (1).
- 296 77. Cranial end of pygostyle with a pair of laminar, ventrally projected processes:  
297 absent (0); present (1).
- 298 78. Distal constriction of pygostyle: absent (0); present (1).
- 299 79. Ossified uncinat processes in adults: absent (0); present and free (1); present and  
300 fused (2).
- 301 80. Uncinate process, orientation: perpendicular to rib (0); angled dorsally defining an  
302 acute angle with the rib (1).
- 303 81. Gastralia: present (0); absent (1).
- 304 82. Coracoid shape: rectangular to trapezoidal in profile (0); strutlike (1).

- 305 83. Coracoid and scapula articulation: Scapula and coracoid articulation: (0)  
306 pit-shaped scapular cotyla developed on the coracoid, and coracoidal tubercle  
307 developed on the scapula (“ball and socket” articulation); (1) scapular articular  
308 surface of coracoid convex; (2) flat.
- 309 84. Scapula: articulated at the shoulder (proximal) end of the coracoid (0); well below  
310 it (1).
- 311 85. Coracoid, humeral articular (glenoid) facet: dorsal to acrocoracoid process/“biceps  
312 tubercle” (0); ventral to acrocoracoid process (1).
- 313 86. Humeral articular facets of the coracoid and the scapula: placed in the same plane  
314 (0); forming a sharp angle (1).
- 315 87. Coracoid, acrocoracoid: straight (0); hooked medially (1).
- 316 88. Laterally compressed shoulder end of coracoid, with nearly aligned acrocoracoid  
317 process, humeral articular surface, and scapular facet, in dorsal view: absent (0);  
318 present (1).
- 319 89. Procoracoid process on coracoid: absent (0); present (1).
- 320 90. Lateral margin of coracoid: concave (0); nearly concave to straight for most part  
321 and the convex portion is restricted at sternal end, which measures less than half  
322 the width of sternal end (1); strongly convex, and the convex portion measuring  
323 more than half the sternal end (2).
- 324 91. Broad, deep fossa on the dorsal surface of the coracoid (dorsal coracoidal fossa):  
325 absent (0); present (1).
- 326 92. Supracoracoidal nerve foramen of coracoid: centrally located (0); displaced  
327 toward (often as an incisure) the medial margin of the coracoid (1); displaced so  
328 that it nerve no longer passes through the coracoid (absent) (2). (ORDERED).
- 329 93. Coracoid, medial surface, strongly depressed elongate furrow at the level of the  
330 passage of n. supracoracoideus: absent (0); present (1).
- 331 94. Supracoracoid nerve foramen, location relative to dorsal coracoidal fossa: above  
332 fossa (0); inside fossa (1).

- 333 95. Coracoid, sternolateral corner: unexpanded (0); expanded (1); well developed  
334 squared-off lateral process (sternocoracoidal process) (2); present and with a  
335 distinct omal projection (hooked) (3).
- 336 96. Scapular shaft: straight, both dorsal and ventral margins straight (0); straight shaft  
337 with convex dorsal margin and straight ventral margin (1); the scapular shaft  
338 sagittally curved (2).
- 339 97. Scapula, length: shorter than humerus (0); as long as or longer than humerus (1).
- 340 98. Scapular acromion process: in lateral or costal view, strongly projecting  
341 craniodorsally, forming a large angle with the proximal shaft of the scapular (0);  
342 nearly parallel to the shaft of the scapular (1).
- 343 99. Scapula, acromion process: projected cranially surpassing the articular surface for  
344 coracoid (facies articularis coracoidea; Baumel and Witmer, 1993) (0); projected  
345 less cranially than the articular surface for coracoid (1).
- 346 100. Scapula, acromion process, in costal or lateral aspect: straight and tapered toward  
347 cranial end (0); barely tapered with a blunt end (1); laterally hooked tip (2).
- 348 101. Proximal end of scapula, pit between acromion and humeral articular facet  
349 (scapular fossa): absent (0); present (1).
- 350 102. Costal surface of scapular blade with prominent longitudinal furrow: absent (0);  
351 present (1).
- 352 103. Scapular caudal end: blunt (may or may not be expanded) (0); sharply tapered  
353 (1).
- 354 104. Furcular, shape: boomerang-shaped (0); V to Y-shaped (1); U-shaped (2).
- 355 105. Furcula interclavicular angle: approximately 90 °(0); less than 70 °(1). The  
356 interclavicular angle is measured as the angle formed between three points, one at  
357 the omal end of each rami and the apex located at the clavicular symphysis.
- 358 106. Dorsal and ventral margins of the furcula: subequal in width (0); ventral margin  
359 distinctly wider than the dorsal margin so that the furcular ramus appears concave  
360 laterally (1).

- 361 107. Hypocleideum: absent (0); present as a tubercle or short process (1); present as  
362 an elongate process approximately 30% rami length (2); hypertrophied, exceeding  
363 50% rami length (3). (ORDERED)
- 364 108. Sternum: unossified (0); partially ossified, coracoidal facets cartilaginous (1);  
365 fully ossified (2).
- 366 109. Ossified sternum: two flat plates (0); single flat element (1); single element, with  
367 slightly raised midline ridge (2); single element, with projected carina (3).
- 368 110. Sternal carina: near to, or projecting rostrally from, the cranial border of the  
369 sternum (0); not reaching the cranial border of the sternum (1).
- 370 111. Sternum, caudal margin, number of paired caudal trabecula: none (0); one (1);  
371 two (2). The use of “lateral” and “medial” to identify the specific sternal processes  
372 is abandoned here due to the difficulty of identifying trabecula when only one is  
373 present.
- 374 112. Sternum, outermost trabecula, shape: tips terminate cranial to caudal end of  
375 sternum (0); tips terminate at or approaching caudal end of sternum (1); tips  
376 extend caudally past the termination of the sternal midline (2).
- 377 113. Prominent distal expansion in the outermost trabecula of the sternum: absent (0);  
378 present, simple bulb-like (1); fan-shaped expansion (2); triangular expansion with  
379 an acute medial angle (3); branched (4).
- 380 114. Rostral margin of the sternum broad and rounded: absent (0); present (1).
- 381 115. Sternum, coracoidal sulci spacing on cranial edge: widely separated  
382 mediolaterally (0); adjacent (1); crossed on midline (2).
- 383 116. Costal facets of the sternum: absent (0); present (1).
- 384 117. Sternal costal processes: three (0); four (1); five (2); six (3); seven (4); eight (5).  
385 (ORDERED)
- 386 118. Sternal midline, caudal end: blunt W-shape (0); V-shape (1); elongate straight  
387 projection (xiphoid process) (2); xiphoid process slightly flared mediolaterally (3);

388 xiphoid process distal end strongly flared with prominent medial and lateral  
389 projections (4); rounded (5).

390 119. Sternum, caudal half, paired enclosed fenestra: absent (0); present (1).

391 120. Sternum, dorsal surface, pneumatic foramen (or foramina): absent (0); present  
392 (1).

393 121. Proximal and distal humeral ends: twisted (0); expanded nearly in the same plane  
394 (1).

395 122. Humeral head: concave cranially and convex caudally (0); globe shaped,  
396 craniocaudally convex (1).

397 123. Proximal margin of the humeral head concave in its central portion, rising  
398 ventrally and dorsally: absent (0); present (1).

399 124. Humerus, proximocranial surface, well-developed circular fossa on midline:  
400 absent (0); present (1).

401 125. Humerus with distinct transverse ligamental groove: absent (0); present (1).

402 126. Humerus, ventral tubercle projected caudally, separated from humeral head by  
403 deep capital incision: absent (0); present (1).

404 127. Pneumatic fossa in the caudoventral corner of the proximal end of the humerus:  
405 absent or rudimentary (0); well developed (1).

406 128. Humerus, deltopectoral crest: projected dorsally (the plane of the crest is  
407 coplanar to the cranial surface of the humerus) (0); projected cranially (1).

408 129. Humerus, deltopectoral crest: less than shaft width (0); approximately same  
409 width (1); prominent and subquadrangular (i.e., subequal length and width) (2).

410 130. Humerus, deltopectoral crest, perforated by a large fenestra: absent (0); present  
411 (1).

412 131. Humerus, bicipital crest: little or no cranial projection (0); developed as a cranial  
413 projection relative to shaft surface in ventral view (1); hypertrophied, rounded  
414 tumescence (2).

- 415 132. Humerus, distal end of bicipital crest, pit-shaped fossa for muscular attachment:  
416 absent (0); craniodistal on bicipital crest (1); directly ventrodistal at tip of bicipital  
417 crest (2); caudodistal, variably developed as a fossa (3).
- 418 133. Distal end of the humerus very compressed craniocaudally: absent (0); present  
419 (1).
- 420 134. Humerus, demarcation of muscle origins (e. g., m. extensor metacarpi radialis in  
421 Aves) on the dorsal edge of the distal humerus: no indication (0); a pit or a  
422 tubercle (1); a variably projected scar-bearing tubercle (dorsal supracondylar  
423 process) (2).
- 424 135. Well-developed brachial depression on the cranial face of the distal end of the  
425 humerus: absent (0); present (1).
- 426 136. Well-developed olecranon fossa on the caudal face of the distal end of the  
427 humerus: absent (0); present (1).
- 428 137. Humerus, distal end, caudal surface, groove for passage of m. scapulothoracicus:  
429 absent (0); present (1).
- 430 138. Humerus, m. humerotricipitalis groove: absent (0); present as a well-developed  
431 ventral depression contiguous with the olecranon fossa (1).
- 432 139. Humerus, distal margin: approximately perpendicular to long axis of humeral  
433 shaft (0); ventrodistal margin projected significantly distal to dorsodistal margin,  
434 distal margin angling strongly ventrally (sometimes described as a well-projected  
435 flexor process) (1).
- 436 140. Humeral distal condyles: mainly located on distal aspect (0); on cranial aspect  
437 (1).
- 438 141. Humerus, long axis of dorsal condyle: at low angle to humeral axis,  
439 proximodistally oriented (0); at high angle to humeral axis, almost transversely  
440 oriented (1).
- 441 142. Humerus, distal condyles: subround, bulbous (0); weakly defined, “straplike”  
442 (1).

- 443 143. Humerus, ventral condyle: length of long axis of condyle less than the same  
444 measure of the dorsal condyle (0); same or greater (1).
- 445 144. Ulna: shorter than humerus (0); nearly equivalent to or longer than humerus (1).
- 446 145. Ulnar shaft, radial-shaft/ulnar-shaft ratio: larger than 0.70 (0); smaller than 0.70  
447 (1).
- 448 146. Ulna, cotylae: dorsoventrally adjacent (0); widely separated by a deep groove  
449 (1).
- 450 147. Ulna, dorsal cotyla strongly convex: absent (0); present (1).
- 451 148. Ulna, bicipital scar: absent (0); developed as a slightly raised scar (1); developed  
452 as a conspicuous tubercle (2).
- 453 149. Proximal end of the ulna with a well-defined area for the insertion of m.  
454 brachialis anticus: absent (0); present (1).
- 455 150. Semilunate ridge on the dorsal condyle of the ulna: absent (0); present (1).
- 456 151. Shaft of radius with a long longitudinal groove on its ventrocaudal surface:  
457 absent (0); present (1).
- 458 152. Ulnare: heart-shaped with little differentiation into short rami (0); U-shaped to  
459 V-shaped, well-developed rami (1).
- 460 153. Ulnare, ventral ramus (crus longus, Baumel and Witmer, 1993): shorter than  
461 dorsal ramus (crus brevis) (0); same length as dorsal ramus (1); longer than dorsal  
462 ramus (2).
- 463 154. Semilunate carpal and proximal ends of metacarpals in adults: unfused (0);  
464 semilunate fused to the alular (I) metacarpal (1); semilunate fused to the major (II)  
465 and minor (III) metacarpals (2); fusion of semilunate and all metacarpals (3). Any  
466 specimen that is inferred to be a juvenile should be scored as a “?” in order to  
467 account for the possibility of ontogenetic change.
- 468 155. Semilunate carpal, position relative to the alular metacarpal (I): over entire  
469 proximal surface (0); over less than one-half proximal surface or no contact  
470 present (1).

- 471 156. Carpometacarpus, proximal ventral surface: flat (0); raised ventral projection  
472 contiguous with minor metacarpal (1); pisiform process forming a distinct  
473 peg-like projection (2).
- 474 157. Carpometacarpus, ventral surface, supratrochlear fossa deeply excavating  
475 proximal surface of pisiform process: absent (0); present (1).
- 476 158. Round-shaped alular metacarpal (I): absent (0); present (1).
- 477 159. Alular metacarpal (I), extensor process: absent, no cranioproximally projected  
478 muscular process (0); present, tip of extensor process just surpassed the distal  
479 articular facet for phalanx 1 in cranial extent (1); tip of extensor process  
480 conspicuously surpasses articular facet by approximately half the width of facet,  
481 producing a pronounced knob (2); tip of extensor process conspicuously surpasses  
482 articular facet by approximately the width of facet, producing a pronounced knob  
483 (3). (ORDERED)
- 484 160. Alular metacarpal (I), distal articulation with phalanx I: ginglymoid (0); shelf (1);  
485 ball-like (2).
- 486 161. Metacarpal III, craniocaudal diameter as a percentage of same dimension of  
487 metacarpal II: approximately equal or greater than 50% (0); less than 50% (1).
- 488 162. Proximal extension of metacarpal III: level with metacarpal II (0); ending distal  
489 to proximal surface of metacarpal II (1).
- 490 163. Intermetacarpal process or tubercle on metacarpal II: absent (0); present as scar  
491 (1); present as tubercle or flange (2).
- 492 164. Intermetacarpal space: absent or very narrow (0); at least as wide as the  
493 maximum width of minor metacarpal (III) shaft (1).
- 494 165. Intermetacarpal space: reaches proximally as far as the distal end of metacarpal  
495 I (0); terminates distal to end of metacarpal I (1).
- 496 166. Distal end of metacarpals: unfused (0); partially or completely fused (1).
- 497 167. Minor metacarpal (III) projecting distally more than the major metacarpal (II):  
498 absent (0); present (1).



- 499 168. Alular digit (I), phalanx 1, distal extension relative to the major metacarpal (II):  
500 beyond the distal end of major metacarpal (0); approximately equal in distal  
501 extension (1); shorter than the distal end but beyond half of the major metacarpal  
502 (2); terminating less than half of the major metacarpal (3). (ORDERED)
- 503 169. Proximal phalanx of major digit (II): of normal shape (0); flat and craniocaudally  
504 expanded (1).
- 505 170. Major digit (II), phalanx 1, internal index process on caudodistal edge: absent (0);  
506 present (1).
- 507 171. Second phalanx of major digit (II): longer than proximal phalanx (0); shorter  
508 than or equivalent to proximal phalanx (1).
- 509 172. Ungual phalanx of major digit (II): present (0); absent (1).
- 510 173. Ungual phalanx of major digit (II): larger or subequal to other manual unguals  
511 (0); smaller than the alular ungual but larger than that of the minor (III) digit, and  
512 the ungual of the minor digit may or may not present (1); smaller than the unguals  
513 of the alular and minor digits (2).
- 514 174. Proximal phalanx of the minor digit (III) much shorter than the remaining  
515 non-ungual phalanges of this digit: absent (0); present (1).
- 516 175. Ungual phalanx of minor digit (III): present (0); absent (1).
- 517 176. Length of manus (semilunate carpal + major metacarpal and digit) relative to  
518 humerus: longer (0); subequal (1); shorter (2). (ORDERED)
- 519 177. Intermembral index = (length of humerus + ulna)/(length of femur + tibiotarsus):  
520 less than 0.7, flightless (0); between 0.7 and 0.9 (1); between 0.9 and 1.1 (2);  
521 greater than 1.1 (3).
- 522 178. Pelvic elements in adults, at the level of the acetabulum: unfused or partial  
523 fusion (0); completely fused (1).
- 524 179. Ilium/ischium, distal co-ossification to completely enclose the ilioischadic  
525 fenestra: absent (0); present (1).

- 526 180. Preacetabular process of ilium twice as long as postacetabular process: absent (0);  
527 present (1).
- 528 181. Preacetabular ilium: approach on midline, open, or cartilaginous connection (0);  
529 co-ossified, dorsal closure of “iliosynsacral canals” (1).
- 530 182. Ilium, m. cuppedicus fossa as broad, mediolaterally oriented surface directly  
531 cranioventral to acetabulum: present (0); surface absent, insertion variably marked  
532 by a small entirely lateral fossa cranial to acetabulum (1).
- 533 183. Preacetabular pectineal process (Baumel and Witmer, 1993): absent (0); present  
534 as a small flange (1); present as a well-projected flange (2). (ORDERED)
- 535 184. Small acetabulum, acetabulum/ilium length ratio equal to or smaller than 0.11:  
536 absent (0); present (1).
- 537 185. Prominent antitrochanter: caudally directed (0); caudodorsally directed (1).
- 538 186. Postacetabular process shallow, less than 50% of the depth of the preacetabular  
539 wing at the acetabulum: absent (0); present (1).
- 540 187. Iliac brevis fossa: present (0); absent (1).
- 541 188. Ischium: two-thirds or less the length of the pubis (0); more than two-thirds the  
542 length of the pubis (1).
- 543 189. Obturator process of ischium: prominent (0); reduced or absent (1).
- 544 190. Ischium, caudal demarcation of the obturator foramen: absent (0); present,  
545 developed as a small flange or raised scar contacting/fused with pubis and  
546 demarcating the obturator foramen distally (1).
- 547 191. Ischium with a proximodorsal (or proximocaudal) process: absent (0); present  
548 (1).
- 549 192. Ischiadic terminal processes forming a symphysis: present (0); absent (1).
- 550 193. Orientation of proximal portion of pubis: cranially to subvertically oriented (0);  
551 retroverted, separated from the main synsacral axis by an angle ranging between  
552 65 °and 45 °(1); more or less parallel to the ilium and ischium (2). (ORDERED)

553 194. Pubic pedicel: cranioventrally projected (0); ventrally or caudoventrally  
554 projected (1).

555 195. Pubic pedicel of ilium very compressed laterally and hook-like: absent (0),  
556 present (1).

557 196. Pubic shaft laterally compressed throughout its length: absent (0); present (1).

558 197. Pubic apron: present (0); absent (absence of symphysis) (1).

559 198. Pubic foot: flaring into simple round shape (0); triangular shape with a pointed  
560 caudal tip and caudoventrally directed with respect to the distal pubic shaft (1); the  
561 caudal tip recurved caudodorsally with respect to the distal pubic shaft (2); absent  
562 (3). Contrary to O'Connor and Zhou 2013, pubic foot is considered present in  
563 *Confuciusornis*.

564 199. Femur with distinct fossa for the capital ligament: absent (0); present (1).

565 200. Femoral neck: present (0); absent (1).

566 201. Femoral anterior trochanter: separated from the greater trochanter (0); fused to it,  
567 forming a trochanteric crest with a laterally curved edge (1); fused to it, forming a  
568 trochanteric crest with a flattened edge (2).

569 202. Femoral trochanteric crest: projects proximally beyond femoral head (0); equal  
570 in proximal projection (1); does not project beyond femoral head (2).

571 203. Femoral posterior trochanter: present, developed as a slightly projected tubercle  
572 or flange (0); hypertrophied, "shelf-like" conformation (1); absent (2).

573 204. Femur with prominent patellar groove: absent (0); present as a continuous  
574 extension onto the distal shaft (1); present and separated from the shaft by a slight  
575 ridge, giving it a pocketed appearance (2).

576 205. Femur: ectocondylar tubercle and lateral condyle separated by deep notch (0);  
577 ectocondylar tubercle and lateral condyle contiguous but without developing a  
578 tibiofibular crest (1); tibiofibular crest present, defining laterally a fibular trochlea  
579 (2). (ORDERED)

- 580 206. Caudal projection of the lateral border of the distal end of the femur, proximal  
581 and contiguous to the ectocondylar tubercle/tibiofibular crest: absent (0); present  
582 (1).
- 583 207. Femoral popliteal fossa distally bounded by a complete transverse ridge: absent  
584 (0); present (1).
- 585 208. Fossa for the femoral origin of m. tibialis cranialis: absent (0); present (1).
- 586 209. Tibia, calcaneum, and astragalus: unfused or poorly co-ossified (sutures still  
587 visible) (0); complete fusion of tibia, calcaneum, and astragalus (1).
- 588 210. Round proximal articular surface of tibiotarsus: absent (0); present (1).
- 589 211. Tibiotarsus, proximal articular surface: flat (0); angled so that the medial margin  
590 is elevated with respect to the lateral margin (1).
- 591 212. Tibiotarsus, cnemial crests: absent (0); present, one (1); present, two (2).
- 592 213. Tibia, caudal extension of articular surface for distal tarsals/tarsometatarsus:  
593 absent, articular restricted to distalmost edge of caudal surface (0); well-developed  
594 caudal extension, sulcus cartilaginis tibialis of Aves (Baumel and Witmer, 1993),  
595 distinct surface extending up the caudal surface of the tibiotarsus (1); with  
596 well-developed, caudally projecting medial and lateral crests (2). (ORDERED)
- 597 214. Extensor canal on tibiotarsus: absent (0); present as an emarginate groove (1);  
598 groove bridged by an ossified supratendinal bridge (2). (ORDERED)
- 599 215. Tibia/tarsal-formed condyles: medial condyle projecting farther cranially than  
600 lateral condyle (0); equal in cranial projection (1).
- 601 216. Tibia/tarsal-formed condyles, mediolateral widths: medial condyle wider (0);  
602 approximately equal (1); lateral condyle wider (2). (ORDERED).
- 603 217. Tibia/tarsal-formed condyles: gradual sloping of condyles towards midline of  
604 tibiotarsus (0); no tapering of either condyle (1).
- 605 218. Proximal end of the fibula: prominently excavated by a medial fossa (0); nearly  
606 flat (1).

- 607 219. Fibula, tubercle for m. iliofibularis: craniolaterally directed (0); laterally directed  
608 (1); caudolaterally or caudally directed (2). (ORDERED)
- 609 220. Fibula, distal end reaching the proximal tarsals: present (0); absent (1).
- 610 221. Distal tarsals in adults: free (0); completely fused to the metatarsals (1). Any  
611 specimen that is inferred to be a juvenile should be scored as a “?” in order to  
612 account for the possibility of ontogenetic change.
- 613 222. Metatarsals II-IV, intermetatarsal fusion: absent or minimal co-ossification (0);  
614 partial fusion, sutural contacts easily discernible (1); completely or nearly  
615 completely fused, sutural contacts absent or poorly demarcated (2). (ORDERED)
- 616 223. Proximal end of metatarsus: plane of articular surface perpendicular to  
617 longitudinal axis of metatarsus (0); strongly inclined dorsally (1).
- 618 224. Metatarsal V: present (0); absent (1). Metatarsal V is absent in *Shenqiornis*  
619 (contra with O’Connor and Zhou, 2013)
- 620 225. Proximal end of metatarsal III: in the same plane as metatarsals II and IV (0);  
621 plantarly displaced with respect to metatarsals II and IV (1).
- 622 226. Tarsometatarsal proximal vascular foramen/foramina: absent (0); one between  
623 metatarsals III and IV (1); two (2).
- 624 227. Metatarsals, relative mediolateral width: metatarsal IV approximately the same  
625 width as metatarsals II and III (0); metatarsal IV narrower than metatarsals II and  
626 III (1); metatarsal IV greater in width than either metatarsal II or III (2).
- 627 228. Well-developed tarsometatarsal intercotylar eminence: absent (0); present, low  
628 and rounded (1); present, high and peaked (2).
- 629 229. Tarsometatarsus, projected surface and/or grooves on proximocaudal surface  
630 (associated with the passage of tendons of the pes flexors in Aves; hypotarsus):  
631 absent (0); developed as caudal projection with flat caudal surface (1); projection,  
632 with distinct crests and grooves (2); at least one groove enclosed by bone caudally  
633 (3). (ORDERED)
- 634 230. Plantar surface of tarsometatarsus excavated: absent (0); present (1).

- 635 231. Tarsometatarsal distal vascular foramen completely enclosed by metatarsals III  
636 and IV: absent (0); present (1).
- 637 232. Metatarsal I: straight (0); J-shaped, the articulation of the hallux is located on the  
638 same plane as the attachment surface of the metatarsal I (1); J-shaped; the  
639 articulation of the hallux is perpendicular to the attachment surface (2); the distal  
640 half of the metatarsal I is laterally deflected so that the laterodistal surface is  
641 concave (3).
- 642 233. Metatarsal II tubercle (associated with the insertion of the tendon of the m.  
643 tibialis cranialis in Aves): absent (0); present, on approximately the center of the  
644 proximodorsal surface of metatarsal II (1); present, developed on lateral surface of  
645 metatarsal II, at contact with metatarsal III or on lateral edge of metatarsal III (2).  
646 (ORDERED)
- 647 234. Metatarsal II, distal plantar surface, fossa for metatarsal I (fossa metatarsi I;  
648 Baumel and Witmer, 1993): absent (0); shallow notch (1); conspicuous ovoid  
649 fossa (2). (ORDERED)
- 650 235. Relative position of metatarsal trochleae: trochlea III more distal than trochleae  
651 II and IV (0); trochlea III at same level as trochlea IV, both more distal than  
652 trochlea II (1); trochlea III at same level as trochleae II and IV (2); distal extent of  
653 trochlea III intermediate to trochlea IV and II where trochlea IV projects furthest  
654 distally (3).
- 655 236. Metatarsal II, distal extent of metatarsal II relative to metatarsal IV:  
656 approximately equal in distal extent (0); metatarsal II shorter than metatarsal IV  
657 but reaching distally farther than base of metatarsal IV trochlea (1); metatarsal II  
658 shorter than metatarsal IV, reaching distally only as far as base of metatarsal IV  
659 trochlea (2).
- 660 237. Distal tarsometatarsus, trochlea in distal view: aligned in a single plane (0);  
661 metatarsal II slightly displaced plantarly with respect to III and IV (1); metatarsal

662 II strongly displaced plantarly in respect to III and IV, such that there is little or no  
663 overlap in medial view (2).

664 238. Trochlea of metatarsal II broader than the trochlea of metatarsal III: absent (0);  
665 present (1).

666 239. Metatarsal III, trochlea in plantar view, proximal extent of lateral and medial  
667 edges of trochlea: trochlear edges approximately equal in proximal extent (0);  
668 medial edge extends farther (1).

669 240. Distal end of metatarsal II strongly curved medially: absent (0); present (1).

670 241. Digit IV phalanges in distal view, medial trochlear rim enlarged with respect to  
671 lateral trochlear rim: absent (0); present (1); greatly enlarged with the lateral  
672 trochlea reduced to a rounded peg (2).

673 242. Completely reversed hallux (arch of unguis of digit I opposing the arch  
674 of the unguis of digits II-IV): absent (0); present (1).

675 243. Size of claw of hallux relative to other pedal claws: shorter, weaker, and smaller  
676 (0); similar in size (1); longer, more robust, and larger (2).

677 244. Alula: absent (0); present (1).

678 245. Fan-shaped feathered tail composed of more than two elongate rectrices: absent  
679 (0); present (1).

680 246. Sternum, outermost trabecula: mainly parallel to the long axis of the sternum (0);  
681 clearly directed laterally (1).

682 247. Distal end of furcula relative to sternal margin of coracoid: proximal to or level  
683 with the sternal margin of the coracoid (0); well beyond the sternal end of the  
684 coracoid (1). When coracoid and furcula are not remained in natural position, then  
685 their proximodistal lengths are compared.

686 248. Scapula and coracoid: fused (0); unfused (1).

687 249. Scapula, acromion process length relative to the length of the humeral articular  
688 facet: less than half (0); nearly equivalent (1); longer but less than two times (2);  
689 more than two times longer (3); (ORDERED)

- 690 250. Alular digit (I), phalanx 1: longer than the phalanx 1 of digit II (0); shorter than  
691 or equivalent to the phalanx 1 of digit II (1).
- 692 251. Coracoid, width of the sternal end relative to the length along the shaft:  
693 approximately half or greater (0); between half to 1/3 (1); less than 1/3 (2).
- 694 252. Coracoid, sternal margin: convex (0); nearly straight (1); concave (2);
- 695 253. Humerus, deltopectoral crest, distal end recedes abruptly with the humeral shaft:  
696 present (0); absent (1)
- 697 254. Tibia/tarsal-formed condyles, intercondylar groove: mediolaterally broad,  
698 approximately 1/3 width of anterior surface (0); less than 1/3 width of anterior  
699 surface (1).
- 700 255. Metatarsal IV, distal extension of the metatarsal IV relative to the metatarsal III:  
701 shorter and proximal to the proximal margin of the trochleae III (0); shorter but  
702 reaching distally further than the proximal margin of the trochleae III (1);  
703 approximately equal or surpassing the trochleae III (2)
- 704 256. Claw of digit IV, smaller than that of other digits: absent (0); present (1).
- 705 257. The ratio (tibiotarsus length/tarsometatarsus length): 2 or larger (0); between 2  
706 and 1.6 (1); smaller than 1.6 (2). When distal tarsals are not fused with metatarsals,  
707 metatarsal III length is used.
- 708 258. Pedal digit, Penultimate phalanx, longer than preceding phalanges in each digit:  
709 absent (0); present (1).
- 710 259. Proximal phalanx of hallux, the longest non-ungual phalanx: absent (0); present  
711 (1).
- 712 260. Phalanx in digit IV: not as follows (0), the second and the third phalanges  
713 reduced and significantly shorter than the fourth phalanx (1), as before but with  
714 the proximal phalanx reduced to be nearly equal in length with the second and  
715 third phalanx (2).
- 716 261. Ungual in digit III, length relative to the tarsometatarsus: less than 20% the  
717 length of tarsometatarsus (0); 20% – 40% (1); extremely elongated and measuring





741 ??0[01]0?10??1100000000??00?0200?0010?00?1?00100101000?0

742 *Sapeornis*

743 1010010[01]?0?????0010?1?0?????????1?0?????00??0??1????100[01]01??10010?00

744 24000000?00?00?011000000??020?0???10002??????????????00?00001100000??01

745 00111????00??21100001000?0020010101030000??0?110101111?001010??0100?100

746 0?0?111?11000000000000?0000?0011??00?0000000101010

747 *Confuciusornis sanctus*

748 10231111?0?????00010110000120???11?1121010?1100?101?101[01]0111200100002

749 4000?00001?01?0?0?0000??020?0?00000002[12]10??011210000001000210?00000

750 1010000100210001210?000?100?00000002100200000000?10101111000310112010

751 1?1?0010000?111000010001?21000000001100?00?0000000000110

752 *Changchengornis*

753 1?231111?0????????1?????0??????1?11??0?0??100??[12]??????????2??1??024??

754 0?0000??01?0?0?000????020?0?0?000021?0??01??10?0?0???02??????????????01

755 ?????0????0?0000?0??000000021002??0?0??????????[12]??03????????????0???????

756 ??110000?0?0??2??0100?0011?0?00?0?00?00100110

757 *Eoconfuciusornis*

758 [12]?231?1[01]?0??????0?0????????????????1?01??000?100????0?0?00??0??1??02

759 41??0?0?0?00?0??000000?020???0000?02[12]????????????0?00000?100?0??000

760 ?????01?????0??01??00001?0?0000000210020??0?0?0??0??0??01000[12]??????????0?

761 ?????10?????0?000000002?00200?001000??0?000010100100

762 *Jingzhouornis*

763 0023111[12]1?????00??1?????????111??010??10?????0??0?1110?????240[  
764 12]0[12]?000??0?0?????????00?????000?02[12]10??0?1 [012]10?00000??021020[  
765 01]0??11?0101??[01]??0?01??01?00?00000021002?? ??????????????????0?012  
766 ??10??100?0010??110000[01]00??0?1?0200?0?10?????0?001000011?

767 *Confuciusornis dui*

768 ??23111?????????????0?????????1??????0??1?????????????????[012]??14?1  
769 0?0??0?0????????? ?????????? ??????????2[12]?0??0???10?0?0?00021?????????????0  
770 1?????0??1??0[01]00?00?000??0021002????????????????????????????[02]?????????1?  
771 ??????10?????00??0[12]00?0010?0??0?0?1000011?

772 *Boluochia*

773 ?1[12][02]????????? ?????????? ?????????? ?????????? ?????????? ?????????? ?????????? ??????????2???  
774 ?????1????????? ?????????? ?????????? ?[12][12]?[12]?????20???????????? ??????????  
775 ?????????????? ?????????? ?????????? ?????????? ?????????? ?????110101??02?????????0?????????  
776 ???0[01]?100100002??3200?0011??1?????????2?20?????

777 *Concornis*

778 ?????????????? ?????????? ?????????? ?????????? ?????????? ?????????? ?????01??11?????????0?01???  
779 ???111110?02?11?00?1?????1112221222111?20?00111?0[01]0211 ??????1????111  
780 2?????????????0?0??30010[01]0122?????????11?1?[12]?00?0?????????1111?????  
781 ??1110?0010?0[01]??0000?001??01131110?0?2??1??

782 *Eoalulavis*

783 ?????????????????????????????????????????????????????????????00111200??2?0??????????????

784 ??0??11111010211100000010?111?312?0?0010?40?00111100102110010011111111?

785 21?1?????????0??1?01?001????2??0??1????????????????1?1????????????????????

786 ?????????????????????1??1121111?????????

787 *Cathayornis*

788 [12]0[12]0?0????????????????????????????????000????00?????1??1??1??0??11?2????24

789 0?0?0111??1111?0??20??000001?0111?322122311??20?0011?1?010211[01]01011

790 111011????110?31100010?[01]00013001010122000000??11?????100?????12????1??

791 ??[01]?????1?1????????????????????????????????0?1111111?????????

792 *Eocathayornis*

793 ???0??2????????????????????0??0?????000????00?????1????????00????????????????

794 ??????11?????02??000000?0??22121311??20??01??1?000??[01]????11??10??

795 ???0?31??0010??0001200100011????????????????????????????????????????????

796 ?????????????????????????0?111111?????????

797 *Eoenantiornis*

798 [01]010??02????????????????0????????00????????????1????????????????[012]????2

799 4020?????1?0111110101?11000?001??11122[123]?2??110?2000?1??1?000????????

800 ??????11?????10?31??0000?000012001010122??0????????????[12]?001????1?????

801 ??????????11?0?10?????0??1?0?1110011[23]1011?[01]?1?0??2

802 *Gobipteryx*

803 10[12]3101200021?10?????????0??0?1??1?[01]0??10??10??????1????????[012]1

804 0??[12]401????????1111?010?1??0?0010??111[23]????????????0?????0??????

805 0????????11??111 ?????????0?0?01?00?????20????????????10?03??????????

806 10[01]10?011?110010?100??11?0??1?1?????????2??1????????

807 *Longipteryx*

808 ?122111?????????????????????000???00?01?1??1011?????????2????24?0?0

809 1?11?01?1110100????000?000?111132[23]?21111??20?0110?0002??[01]?0?011?1

810 ?11?????0?01100000100?0120010001130000?????1111011[12]11001?0?[12]1?10???

811 ?0????0?1?1?0?1000000001?32000001???1?1211?1?2?2????0

812 *Longirostravis*

813 [01]022??1?????????????????????????????00????00?01?1??1????0????01????24??

814 0?01110?0111????00?2??000000?0111[123]2[123]?224110?20?01??1??00??[01]?

815 ????????10?????0?31??10?0?[01]01012001??0122??0?????1??10?1?11????0?1????

816 ??1?00?????1?11[01]?10010??0?2?0100?00????0?1??111?1?1????0

817 *Neuquenornis*

818 ?????????????????????????????????????????????????????????0???11???????????????

819 ??????1?1????021111000?????1?1111230[12]?1?1????0????11?????1?01?01????11?1?

820 ?11??31??10?0?[01]0001????????????????????????????????????1110????????1????????1

821 0??0?1??1?2?00?011001[12]????1??2[12]0??1?0???

822 *Pengornis*

823 00[01]01101?0?????0?????0?1????????000?0?0?0????11?2??1??0?1?10?1????240

824 ?0[12]????0?01?11????00?????0?02???11?2????????????????001?0100101??[01]?100?1

825 ???11?????1[02][23]111???0?01001?0010?0??3?????????????????02?01??????1

826 ??[01]?01[12]11?0100100100101200201?00?????011?101?[01]011?021

827 *Eopengornis*

828 0000110[012]?0?????????????0?????????00000?000?????1??10?0??00??????????24?

829 ?0?1?????01211101000??000?02?00111321?110?1??10?0010010000??10?0001????

830 10?????0??1[01]?00?0?010012001010103?????????????????000??????0?0??100?

831 ?????0??0001????1??0101?0012?000111101?1011102?

832 *Protopteryx*

833 [12]?[12][02]1??[012]?????????????????????????00?????00?????1??????10?????01

834 ?????14????0??1??1111?0?01?[12]?200?00??0111322111011?[12]10????1????010??

835 ??????????11?????????1??000??[01]0001100000010??00????11?????????0[12]???

836 ?1?????0???????????00??0010??00??0[01]01?001110011?0100?[01]101121?

837 *Rapaxavis*

838 [01]022??1[012]?????????????????????????000??0?0??1?1?????1??01??11?1??02

839 4??0?0?110?01????0?00?[12]?0??001??11?322122411??20??0100??0000??[01]0??

840 ?1111?10??1??0??11?00?010000130011?01230000?0??111101?111?0100?????????0

841 ?0[01]?0?11??100?10000??002?0100?0011??0?121011?10110210

842 *Shanweinia*

843 [01]?[12][23]??1?????????????????????????0??00??01?????1???????????????

844 24?????1?1??01?11??000[12]?000000??011?22[123]?211?[01]?20??1????00???

845 ?????11??11????1?????????????????20?11??22?????????1?????1??0????[01]0

- 846 ?1????????110?0000????1?[01][01]?0?0?1[01]?10?12?111?1011?210
- 847 *Vescornis*
- 848 ?0?????2????????????????????0000??00[12]001?1??21?1??0???1??2????2???
- 849 ???00?01?1??0?02?[12]?000001??011?322120111??20?00110??0101?1[01]0???1
- 850 111111?????1[02]011010?00[01]0?0130010[01]01220?0????????????????????
- 851 ???0?[01]????????00?0010?011?[01]201?1011??11121[01]11?[01]1110?00
- 852 *Vorona*
- 853 ?????????????????????????????????????????????????????????????????????
- 854 ?????????????????????????????????????????????????????????????????????
- 855 ?????????????????????????????????????????????????????101120111?0001111011111[12]0001
- 856 00011?21000000?????????????11???????
- 857 *Schizooura*
- 858 0123111[01]????????????????????????11?0????10??01??0?[12]1?00?00?1??0[345]?
- 859 1??[12][34]?[12]0[12]?000??01011?0?1001??[01]2?00????11012[23]0[12]?011??1??
- 860 1?000??0[12]0010[01]0??01?0?10?????00?31??0000?001?0[23]001010103?0??1[0
- 861 1]1??0101?1?0103?????[12]?0?????[12]??????11?010?00001[01]2?011000010?1?
- 862 01?1110?10000001
- 863 *Jianchangornis*
- 864 ??????????????????????????????????1?????????1?????010?200[234]0???????
- 865 ???????0101110010020?0200?0?0121?02[23]031001??[01]?010000001001000000
- 866 01?0111?????0??1??01?00000002101010103??01?[01]????????[12]?000?????????0

867 0??0?0?10??1120?00?0?????0100?00??01010001110000?0?1

868 *Archaeorhynchus*

869 1013111[12]????????????????????????????????1?00?00?00??1??0??0??0??1??2000??[34

870 ]0111?????01011?00?0?20?[01]20000?0?21002[23]1222 11?[12]5 ???1000??010????

871 0??0110?10????101?01 ??000??0??0?21010??230000????101100?[12]10001??????

872 ???0?0[12]00????211[01]010000????0?0100?00???0010101100000?01[01]

873 *Songlingornis*

874 ???[01]????????????????????????????????000?????0?????1?????????????2?????????????

875 ???????10?????101??2????0??21?02301231[12]??51?????????????????????????????

876 ?????????????????????????????????????????????????????????????0?????????????????????????????

877 ??????????????????????1?10?01???????????

878 *Apsaravis*

879 ?????????????????????????????1[01]?????1?1????1 ?????????021?1 ?201??00?4??0?24?1

880 0?????????1011100001111121102001????[12]30??11?????1100100010111000011111

881 1110121101?3 11001110110????1?????????100011111?111012??113101[12]?110??1???

882 20121??11[12]?111001?1?200100?00??????1??12110?0????

883 *Yanornis*

884 10[12]11102?1?????????1 ??????????????1000??1?00?01?1 ??0?????01??2003??0????

885 ??????????01011110100?0?220001 ??121?02301121[12]??51011001??010110[01]????

886 0100011?0?11?0?3 1110000000010210101012310100? 11?10100?11?003??1????????1

887 ?0??0?0??111011?00[01]??12?0100?0011??0?101001000000000



888 *Patagopteryx*

889 ??????????????1?11110001111?????????????0?000?11211011001100031101??120

890 ???????1011100000?0?1210010?????2[12]????10?????1001???1000?0?00000100?

891 0000?0?0?????????0?1?1?20?00???20?0001000001110121?013?0?20????1001?0?

892 01111120101001110000?00?0001????10??110100000?0

893 *Yixianornis*

894 1121?????????????????0??1?1???0?0??110?????1??1?1??2011?1003??0?24????

895 1000[12]00101110010010?220001001210?2301121[12]0?51??10??11??0?0?0?11001

896 ?0?100021?0??3111010100001?2101010102100?1??00?01??11??003??1?2?101?100

897 ???????11[12]01?0001110?0010??0011?110101011?0000001?

898 *Gansus*

899 ?????????????????????????????????????????????????121?1?201111004001024?2021

900 0000?1101110010020?320??0012100230210100?10?11001??010130?1??01001110

901 0111?0?312?01110001?131010001321?0011110101011210003001[12]?1101?100[12]

902 2?0?0?211201110010102?020000011??001?10110?010000?

903 *Ichthyornis*

904 21[12]??0?????????111111??1111???01001???10021011111[01]11012011120?[34]?

905 0102401021000??101111010010?2210110012?002300?1212?01110011001012021

906 0?101000110021101?3121012101001031111???310?01011??1101121?11?10122110

907 1?100221110?2112011202?01?210200000?????10101001?1????0

908 *Hesperornis*





951 ?????112211000001001012001000?120?????????0101110012?0?????????1???10???

952 1?110010010000?0?02?100011???11?10?1?11100111

953 *Qiliana*

954 ?????????????????????????????????????????????????????????????????????????

955 ?????????????????????????????????????????????????????????????????????????

956 ?????????????????????????10????00?10101?2?0003?0??11100?00?110000?11100?001

957 001?11?[01]?20?0?1[01]??????????1?120021?

958 *Shenqiornis*

959 [01]0101102?????????0?????0?1????????000??000??1?1???11?0?01??11?????????

960 0??????01?11?0?01?[12]?010101??011?[23]2[123]?[12][12]3?1??20?01101?000?

961 ???????1???11??????01??001010010120010101130000????01?111??01??????

962 ???0??????????0?1011??0??[01]?0?0?1??[12]111211[12]01??2?0?21

963 *Sulcavis*

964 [01]010??0?????????????????0?????????000??0?0?????1?????11?????11?[12]??24

965 ?1010110??01????0?010[12]?0[01]0001?0?1113[12][123]??????????01??0?010??

966 ???????1???11??[01]??0?[02]1??0[01][01]0?00?0120010101120?00?[01]?????????[

967 12]10??????????????0?00?0?01??110010010??0[123]??0101?0011???11211[12]01111

968 0012?

969 *Bohaiornis*

970 ?0[12]01102?0?????????????0?????????1000??000??0011?????1?120?1?110[0123]???

971 ?24000?01101?0111110?01020?0[01]0101?0?11122[123]?21311??30?001??100001?

972 10?0?011???11????10?0110000010010120010101230000?????01011[12]?0000?0?

973 1????0?0?0?0?10?1100100100?01?[01]0101?0?11??10121021111000121

974 *Parabohaiornis*

975 [01]0201102?0????????????????????????0000??0000??0??1???01??200??110[12]01?12

976 4??0?01101101?1110?01?11?010101?0111132[123]?20311?[345]30?001??10000101

977 010001110111????10?01??000010010120010101230000??0?0101011[12]1100000?

978 ?????0?0?00?00010?100010010??01200101?0?11??1112102111100022?

979 *Longusunguis*

980 ?0[12]01?02?0????????????????????????0000??0000??01?1??[12]?1??20??1110[123]?

981 ???24?00?0110??01111101020??010001?0111?32[123]????1??[23]00001??10000?

982 ?10?00011??11????10?01??0000100101?00101012200?????????01011[12]?0000???

983 ?1?100?0?00?00010?100?1??000?1??010100?1????112102011?100221

984 *Zhouornis*

985 [01]0101?01?0?????????????????????0??1000??0000??0??11?[12]?1??20??110?????2

986 4??0??1?0?011111010101??020101?0111132[123]?2?3110?0?000??10000??10?00

987 011???11????10?31??000010010120010101220000????????????[12]?00000??1?1?0

988 ?1?00?0?01??110010010??01??0101?0?11??11121?2011110012?

989 *Piscivoravis*

990 ??????????????????1????111?[01]????????????0??0??0??12110110111210[34]????24

991 020??0001101?11?0??0????[23]20????0121002301221??51?0?0????1???0?????1

992 ?0?11?????00?31??00011000102101010112101010????01011210003?01121?01?10?

- 993 22????1?112011100[01]1?02001100001011001?01??0001000?
- 994 *Hongshanornis*
- 995 ?020?10?????????1????????????????00???101?0????????????????1??????24??????
- 996 ?01?0101110010????[01]211?0?0121?12??2201[12]?210?110?????10??2????0????1
- 997 1????????31?00?0?00?02100010101?????????0?01[12]????3??????????0?[12]?
- 998 ??????1120?0?00?0?0?0200?00111100101011001100001
- 999 *Longicrusavis*
- 1000 10[12]01?0????????????????????????????00???101?01????11?11?0???20??????????
- 1001 ?????????1011100?????[12]21100?01210?23?120110?10?110?01?11012021100010
- 1002 001100???0?31110?00010102100010101??????11??1??[12]?0?????????01?100
- 1003 22[01]121?1112011100??10100100?0011?0010101100110000?
- 1004 *Archaeornithura*
- 1005 ?????????????????????????????????????????????????????????????[23]??0[12]4??
- 1006 1110001?0101110010110?221100?0?2101230[12]?111??????0?10010?02????010
- 1007 0?????????0?[23]1??0[12]?0?000?02100010101?0?????????01001[12]??03????2??0?
- 1008 ?1?0???2?0?1110?1?0???[01]?0100?001111?0101011?01100001
- 1009 *Parahongshanornis*
- 1010 ?????????????????????????????????????????????????????????????1?1????????????????????
- 1011 ?????1????0?10????[01]211??01210123022011??10??10??1?010??0???01??11??
- 1012 ?????31??01?0?000102100010101?0?????????10??[12]?003??????0????00??????
- 1013 1????11?0?????1?0100?0011?001?1011?0110000?

1014 *Tianyuornis*

1015 1020??0????????????????????????????????000????01??01?1????????????????????????4??????

1016 ??11?10??0?10??22?????1210123?22111??10?1100??010??0????01?0?11????

1017 ???[23]1??0?0?000102100010101????????????????????????????????1??[12]??12??

1018 ?111011?0????[01]??01?0?0?11??001?1011?0110000?

1019

1020 **Supplementary references**

1021 1. Wang M, Zheng X, O'Connor JK, Lloyd GT, Wang X, Wang Y, Zhang X, Zhou Z.

1022 2015 The oldest record of ornithuromorpha from the Early Cretaceous of China.

1023 *Nat. Commun.* **6**, 6987. (doi:10.1038/ncomms7987)

1024 2. Brusatte SL, Benton MJ, Ruta M, Lloyd GT. 2008 Superiority, competition, and

1025 opportunism in the evolutionary radiation of dinosaurs. *Science* **321**, 1485–1488.

1026 (doi:10.1126/science.1161833)

1027 3. Laurin M. 2004 The evolution of body size, Cope's rule and the origin of amniotes.

1028 *Syst. Biol.* **53**, 594–622. (doi:10.1080/10635150490445706)
